# Supplementary material for: Tracking oxidation-induced alterations in fibrin clot formation by NMR-based methods
Source: PubMed Central journal article supplement (PMC8333047; doi:10.1038/s41598-021-94401-3), 2021-08-03
Supplement: 41598_2021_94401_MOESM1_ESM.pdf [file 41598_2021_94401_MOESM1_ESM.pdf]

## Supplementary Information

### **Tracking oxidation-induced alterations in fibrin clot formation by NMR-based methods**

Wai-Hoe Lau<sup>1</sup>, Nathan J. White<sup>2</sup>, Tsin-Wen Yeo<sup>1,4</sup>, Russell L. Gruen<sup>3\*</sup>, Konstantin Pervushin<sup>5\*</sup>

<sup>1</sup>Lee Kong Chian School of Medicine, Nanyang Technological University, Singapore

<sup>2</sup>Department of Emergency Medicine, University of Washington School of Medicine, Seattle, Washington

<sup>3</sup>ANU College of Health and Medicine, The Australian National University, Canberra ACT, Australia

<sup>4</sup>Communicable Diseases Centre, Institute of Infectious Disease and Epidemiology, Tan Tock Seng Hospital, Singapore

<sup>5</sup>School of Biological Sciences, Nanyang Technological University, Singapore

\*Corresponding authors. E-mail address: russell.gruen@anu.edu.au, kpervushin@ntu.edu.sg



## Supplementary Figure S2

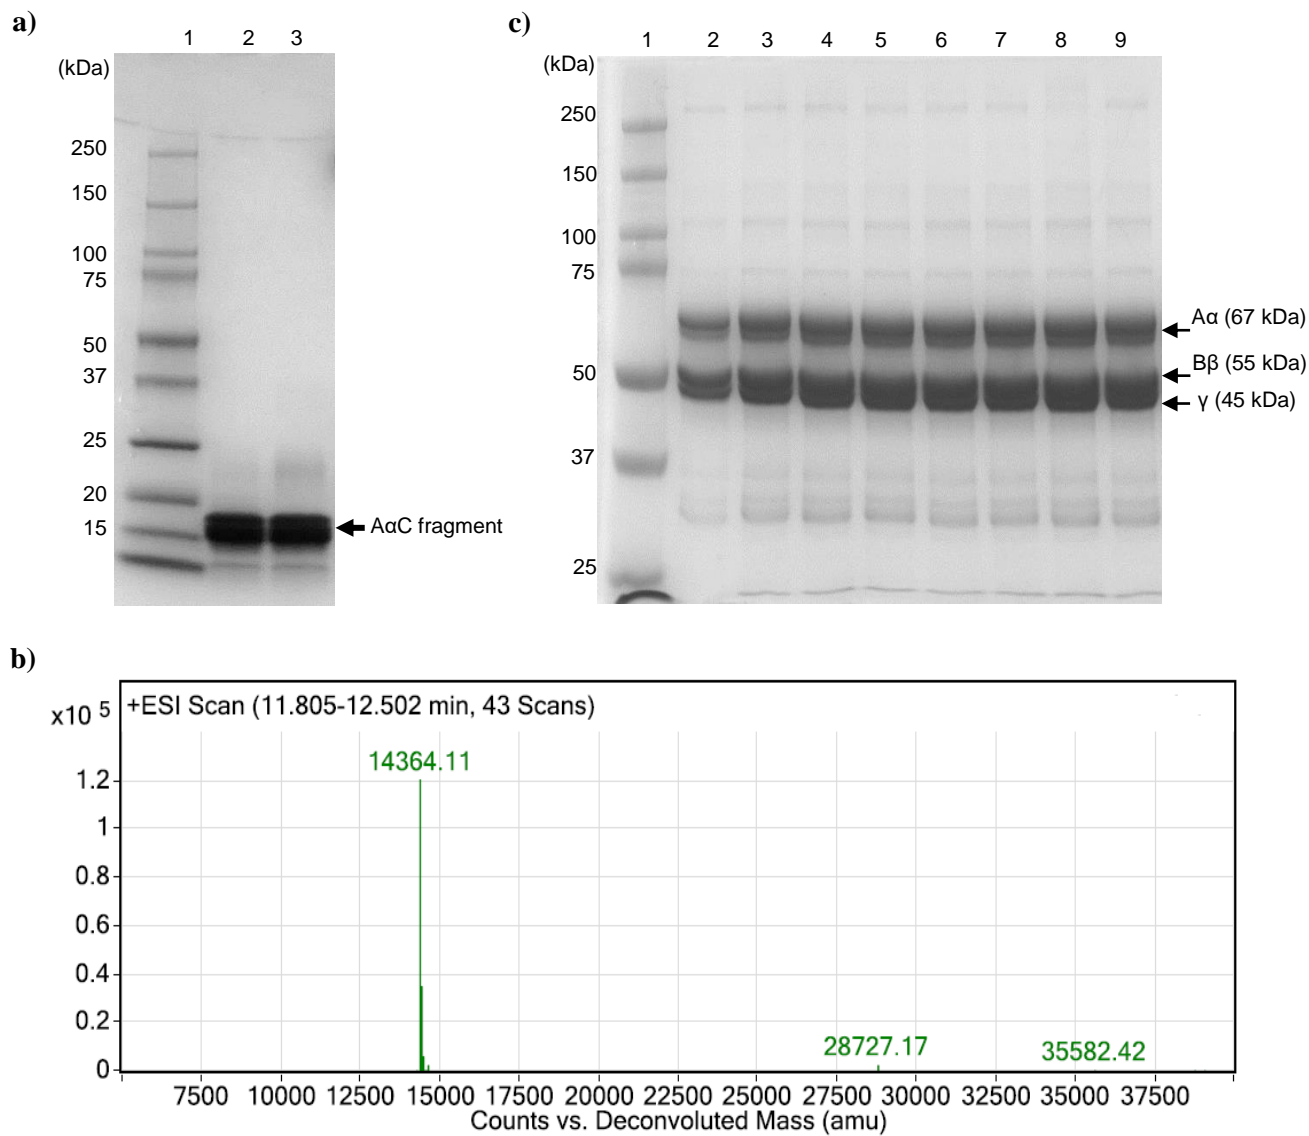

**Figure S2. a)** SDS-PAGE analysis of non-oxidized A $\alpha$ C fragment (A $\alpha$ C 419 - 502) (lane 2) and 150  $\mu$ M HOCl oxidized A $\alpha$ C fragment (A $\alpha$ C 419 - 502) (lane 3) under non-reduced condition. Protein marker was loaded into lane 1. The non-oxidized A $\alpha$ C fragment was used as a control. **b)** Molecular mass determination of A $\alpha$ C fragment was analyzed by ESI-TOF mass spectrometry. The mass range from 7250 to 40000 Da was analyzed. The peak with the highest intensity in the mass spectrum indicated the measured molecular mass of A $\alpha$ C fragment. **c)** SDS-PAGE analysis of fibrinogen control (0 HOCl  $\mu$ M) and the oxidized fibrinogen solutions under reduced condition. The purified fibrinogen was oxidized by increasing HOCl concentrations. Lane 1: protein marker, lane 2: control fibrinogen (0  $\mu$ M HOCl), lane 3 - 9: fibrinogen solutions oxidized by increasing HOCl concentrations (10, 25, 50, 75, 100, 125, 150  $\mu$ M). Fibrinogen without HOCl oxidation (0  $\mu$ M HOCl) was used as a control. Full-length SDS-PAGE gels were presented.

### Supplementary Figure S3

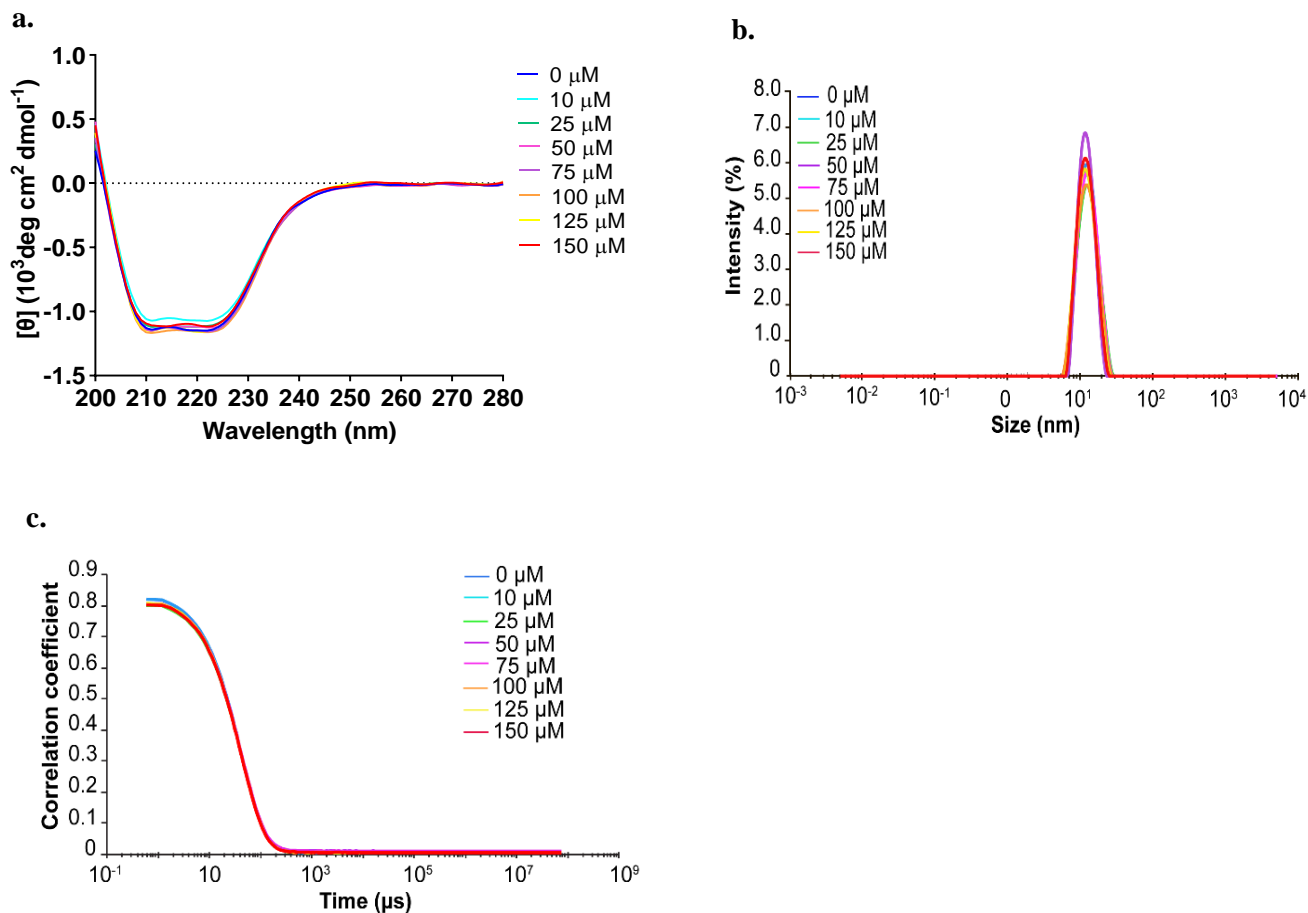

**Figure S3.** **a)** CD analysis of fibrinogen control (0  $\mu\text{M}$  HOCl) and fibrinogen oxidized with increasing HOCl concentrations (10, 25, 50, 75, 100, 125, 150  $\mu\text{M}$ ). The acquired CD spectra were analyzed by the secondary structure prediction program supplied with the spectropolarimeter. All CD data were expressed as the mean residue ellipticity  $[\theta]$ , in units of degrees square centimeter per decimole. **b)** Hydrodynamic radius distribution by intensity for fibrinogen control and fibrinogen oxidized with increasing HOCl concentrations (10, 25, 50, 75, 100, 125, 150  $\mu\text{M}$ ) analyzed by DLS. **c)** Correlation coefficient decay curves of fibrinogen control and oxidized fibrinogen with increasing HOCl concentrations. Fibrinogen without oxidation (0  $\mu\text{M}$  HOCl) was used as a control.

## Supplementary Figure S4

a)

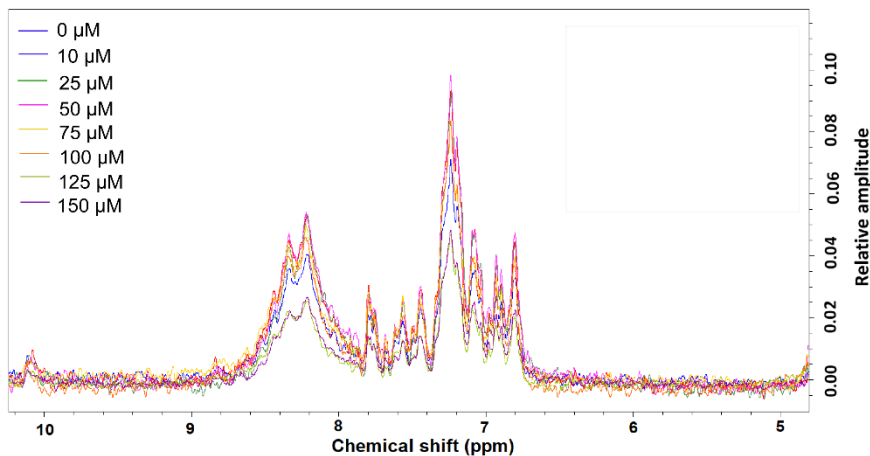

b)

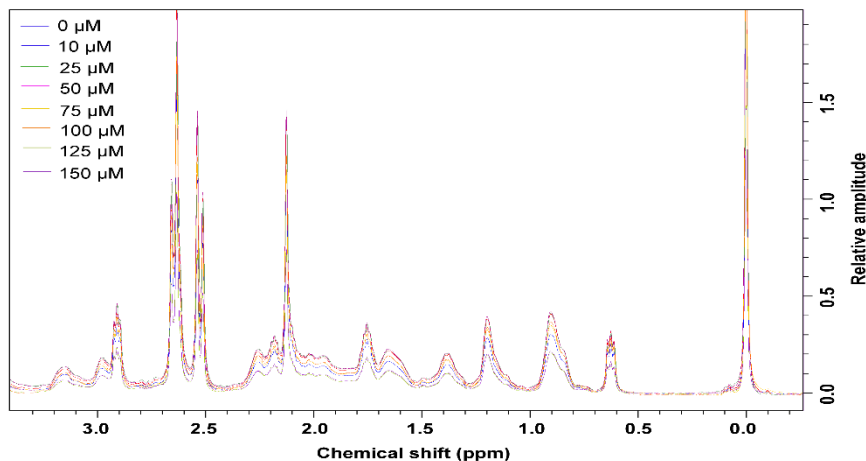

c)

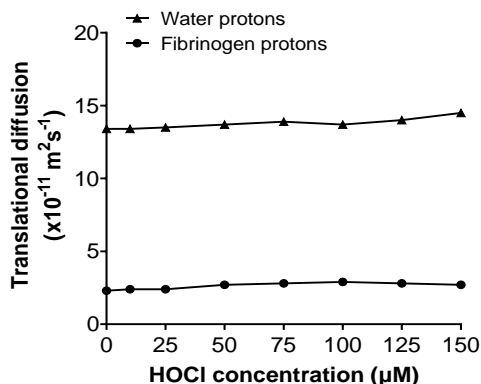

**Figure S4.** <sup>1</sup>H 1D NMR spectra of fibrinogen control (0 μM HOCl) and fibrinogen oxidized with increasing HOCl concentrations (10, 25, 50, 75, 100, 125, 150 μM). **a)** The <sup>1</sup>H signals of fibrinogen solutions were found at the amide region from 6.5 to 8.5 ppm. **b)** The fibrinogen methyl protons were observed at aliphatic region from 0.7 to 0.9 ppm. DSS (2,2-dimethyl-2-silapentane-5-sulfonic acid) was used as a chemical shift standard reference. The <sup>1</sup>H of DSS exhibited resonances at 2.91 ppm, 1.75 ppm, and 0.63 ppm with intensities lower than the reference resonance at 0 ppm. **c)** DOSY NMR analysis of diffusion coefficient (D) for fibrinogen and bound water protons in the fibrinogen solutions oxidized with increasing HOCl concentrations (0, 10, 25, 50, 75, 100, 125, 150 μM). Fibrinogen solution without oxidation (0 μM HOCl) was used as a control. The averaged <sup>1</sup>H fibrinogen signals (0.7 – 0.9 ppm) and water proton (4.72 ppm) were subjected for the analysis. The acquired data from the spectra were fitted to Stejskal-Tanner equation and diffusion coefficient of the samples were analyzed by NMRgenerator and CARA.

## Supplementary Table

**Table S1.** Diffusion coefficient and  $T_2$  relaxation times of water protons in the purified fibrinogen solutions and fibrin gels oxidized by an increasing HOCl concentrations

| HOCl ( $\mu\text{M}$ ) | Fibrinogen solutions <sup>a</sup>                                     |            | Fibrin gels <sup>b</sup>                                              |            |
|------------------------|-----------------------------------------------------------------------|------------|-----------------------------------------------------------------------|------------|
|                        | Diffusion coefficient ( $\times 10^{-9} \text{ m}^2 \text{ s}^{-1}$ ) | $T_2$ (ms) | Diffusion coefficient ( $\times 10^{-9} \text{ m}^2 \text{ s}^{-1}$ ) | $T_2$ (ms) |
| 0 <sup>c</sup>         | 4.64                                                                  | 256.6      | 4.64                                                                  | 211.5      |
| 25                     | 4.64                                                                  | 210.5      | 4.23                                                                  | 335.0*     |
| 50                     | 4.64                                                                  | 210.5      | 4.64                                                                  | 335.2*     |
| 75                     | 4.64                                                                  | 210.5      | 4.64                                                                  | 335.2*     |
| 100                    | 4.64                                                                  | 210.5      | 3.85                                                                  | 335.2*     |
| 150                    | 4.04                                                                  | 187.4      | 3.51                                                                  | 377.5*     |

<sup>a</sup> = Diffusion coefficient (D), and  $T_2$  relaxation times of bulk water protons in the purified fibrinogen solutions and fibrinogen oxidized by an increasing concentration of HOCl (0, 25, 50, 75, 100, 150  $\mu\text{M}$  HOCl); <sup>b</sup> = Diffusion coefficient and  $T_2$  relaxation times of bulk water protons in the fibrin gels oxidized by an increasing concentration of HOCl (0, 25, 50, 75, 100, 150  $\mu\text{M}$  HOCl). <sup>c</sup> = 0  $\mu\text{M}$  HOCl fibrinogen solution and fibrin gel were used as their respective controls. \* = Significant difference vs control at  $\geq 1.5$ -fold change.

**Table S2.** Diffusion coefficient,  $T_1$ , and  $T_2$  relaxation times of water protons in the plasma fibrinogen solutions and plasma fibrin gels formed by adding with an increasing % HOCl-oxidized fibrinogen

| % HOCl-oxidized fibrinogen <sup>c</sup> | Plasma fibrinogen solutions <sup>a</sup>                              |            |            | Plasma fibrin gels <sup>b</sup>                                       |            |            |
|-----------------------------------------|-----------------------------------------------------------------------|------------|------------|-----------------------------------------------------------------------|------------|------------|
|                                         | Diffusion coefficient ( $\times 10^{-9} \text{ m}^2 \text{ s}^{-1}$ ) | $T_1$ (ms) | $T_2$ (ms) | Diffusion coefficient ( $\times 10^{-9} \text{ m}^2 \text{ s}^{-1}$ ) | $T_1$ (ms) | $T_2$ (ms) |
| 0 <sup>d</sup>                          | 3.85                                                                  | 2154       | 104.8      | 3.20                                                                  | 1918       | 148.5      |
| 10                                      | 3.85                                                                  | 2154       | 117        | 3.20                                                                  | 1918       | 166.8      |
| 20                                      | 3.85                                                                  | 2154       | 132.2      | 3.20                                                                  | 1918       | 187.4      |
| 30                                      | 4.23                                                                  | 2154       | 148.5      | 3.20                                                                  | 1918       | 187.4      |
| 40                                      | 4.23                                                                  | 2154       | 148.5      | 3.20                                                                  | 1918       | 236.4*     |
| 50                                      | 4.23                                                                  | 1918       | 236.4*     | 3.51                                                                  | 2420       | 335.3*     |

<sup>a</sup> = Diffusion coefficient (D),  $T_1$ , and  $T_2$  relaxation times of bulk water protons in the plasma fibrinogen solutions added with an increasing % of HOCl-oxidized fibrinogen solution (10, 20, 30, 40, 50%); <sup>b</sup> = Diffusion coefficient (D),  $T_1$ , and  $T_2$  relaxation times water protons in the plasma fibrin gel formed by an increasing % HOCl-oxidized fibrinogen solution; <sup>c</sup> = Purified fibrinogen solution was oxidized by 150  $\mu\text{M}$  HOCl and added into plasma fibrinogen solution prior to clotting; <sup>d</sup> = 0% HOCl-oxidized fibrinogen solution and plasma fibrin gel were used as their respective controls. \* = Significant difference vs control at  $\geq 1.5$ -fold change.

**Table S3.** Fast acquisition of  $T_1$  and  $T_2$  relaxation times of water protons in the plasma fibrinogen solutions and plasma fibrin gels formed by adding with an increasing % HOCl-oxidized fibrinogens

| % HOCl-oxidized fibrinogen <sup>c</sup> | Plasma fibrinogen solutions <sup>a</sup> |            | Plasma fibrin gels <sup>b</sup> |                            |                         |
|-----------------------------------------|------------------------------------------|------------|---------------------------------|----------------------------|-------------------------|
|                                         | $T_1$ (ms)                               | $T_2$ (ms) | $T_1$ (ms)                      | $T_{2i}$ (ms) <sup>d</sup> | $T_2$ (ms) <sup>e</sup> |
| 0 <sup>f</sup>                          | 2656                                     | 46.4       | 2656                            | 25.6                       | 187.4                   |
| 10                                      | 2656                                     | 53.4       | 2656                            | 30.5                       | 215.4                   |
| 20                                      | 2656                                     | 61.4       | 2656                            | 35.1                       | 284.8*                  |
| 30                                      | 2656                                     | 61.4       | 2656                            | 40.4*                      | 284.8*                  |
| 40                                      | 2656                                     | 70.6*      | 3054                            | 61.4*                      | -                       |
| 50                                      | 2656                                     | 123.3*     | 3054                            | 81.1*                      | -                       |

<sup>a</sup> =  $T_1$  and  $T_2$  relaxation times of bulk water protons in plasma fibrinogen solutions added with an increasing % of HOCl-oxidized fibrinogen (10, 20, 30, 40, 50%); <sup>b</sup> =  $T_1$  and  $T_2$  relaxation times of water protons in the plasma fibrin gels formed by an increasing % HOCl-oxidized fibrinogen solution; <sup>c</sup> = Purified fibrinogen was oxidized by 150  $\mu\text{M}$  HOCl and added into plasma fibrinogen solution prior to clotting; <sup>d</sup> =  $T_{2i}$  relaxation time of intermediate water; <sup>e</sup> =  $T_2$  relaxation time of bulk water; <sup>f</sup> = 0% HOCl-oxidized fibrinogen solution and plasma fibrin gel were used as their respective controls. \* = Significant difference vs control at  $\geq 1.5$ -fold change. The  $T_1/T_2$  correlations were measured by 2D-NMR with fast acquisition.
